# Supplementary material
Source: publisher figshare collection journal article supplement (https://frontiersin.figshare.com/ndownloader/files/10526029)
Supplement: Supplementary file [file 10526029]

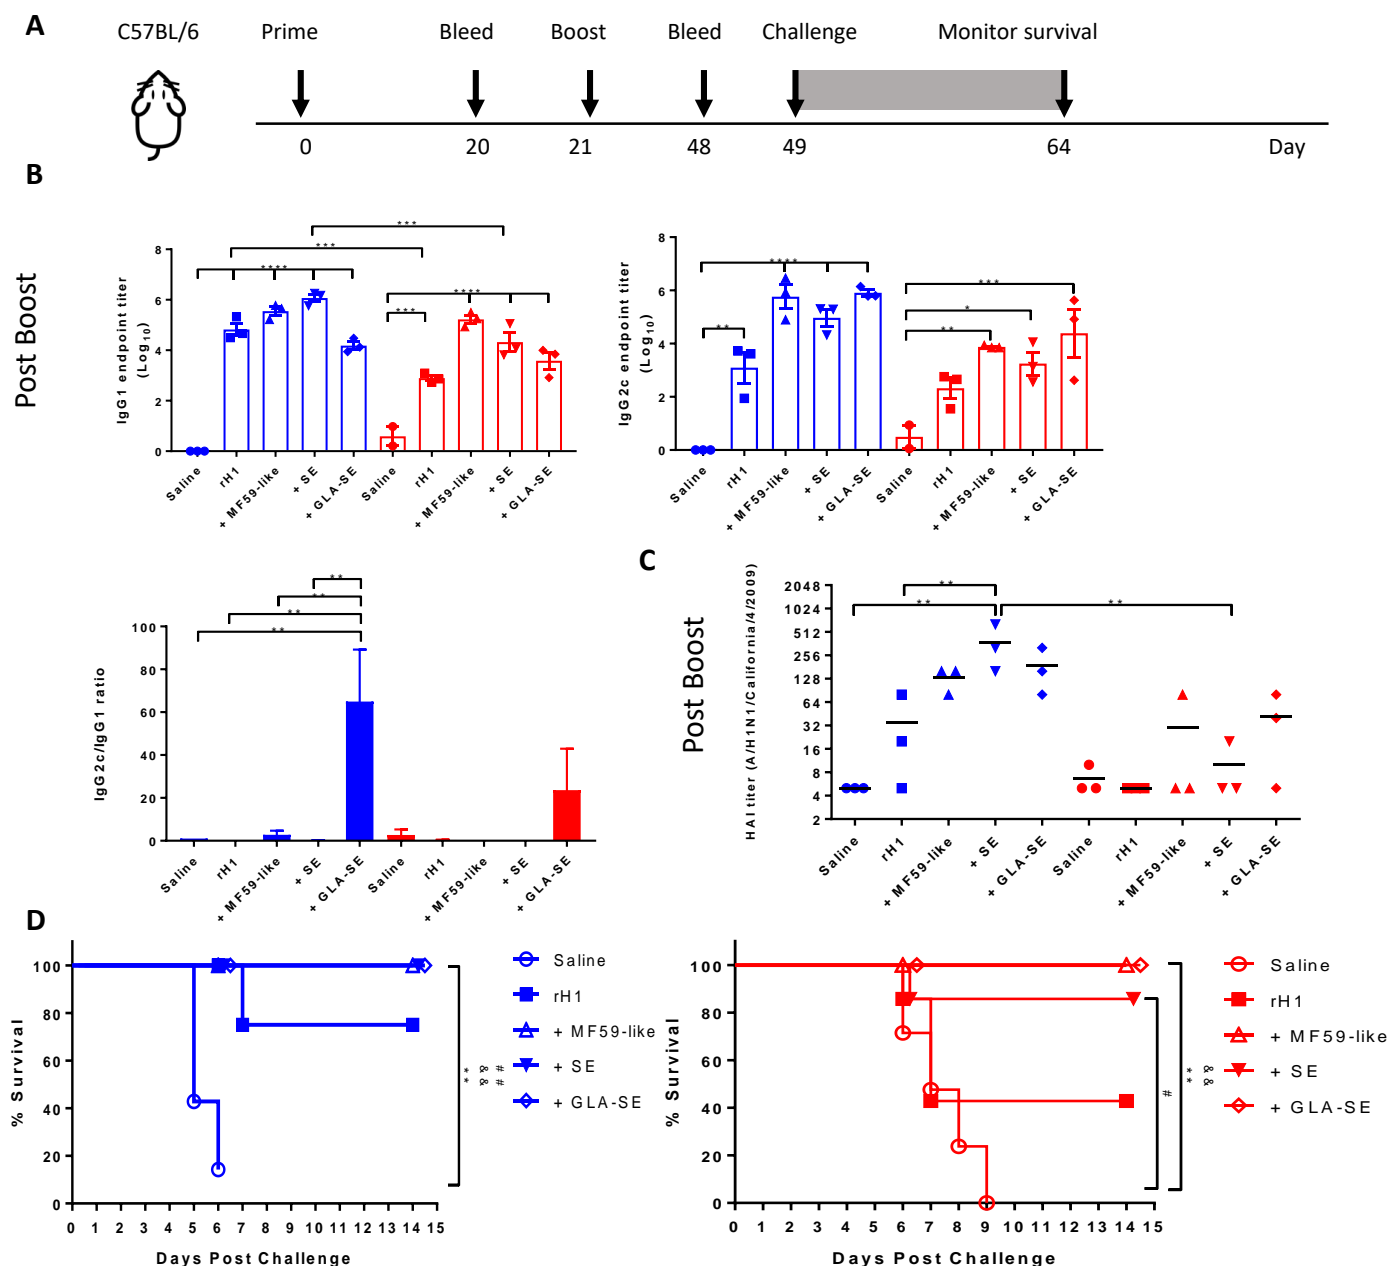

**Supplemental Figure 1. Adjuvanted rH1 vaccines enhance IgG2c:IgG1 ratios and protection in young and aged C57BL/6 mice following a boost**

(A) Scheme of immunization procedure: C57BL/6 mice were immunized i.m. twice, three weeks apart, and antibody analysis was determined on sera collected four weeks following the boost. All mice were challenged with 100LD<sub>50</sub> A/H1N1/California/4/2009 at day 49 and their physical condition was monitored over 14 days. Young mice (blue) and aged mice (red) are shown. (B) Sera collected from saline, rH1, rH1+MF59-like, rH1+SE and rH1+GLA-SE groups were analyzed for H1-specific IgG1 and IgG2c endpoint titers. Results are represented as the mean endpoint titer ( $\text{log}_{10}$ )  $\pm$  SEM. *p* values are denoted as follows: \* indicates  $<0.05$ ; \*\* indicates  $<0.01$ ; \*\*\* indicates  $<0.001$ ; \*\*\*\* indicates  $<0.0001$ . (C) Sera harvested from mice after a boost (day 48) immunization were analyzed for HAI titers. An HAI titer of 5 represents responses below the assay detection limit. \*\* indicates *p* value  $<0.01$ . (D) Survival was monitored over the course of 14 days among all groups of young mice (left panel, blue) and aged mice (right panel, red). && indicates *p* value  $<0.01$  between saline vs. MF59-like groups; ## indicates *p* value  $<0.01$  between saline vs. SE groups; \*\* indicates *p* value  $<0.01$  between saline vs. GLA-SE groups.
